# Supplementary material for: Biotic and abiotic transformation of amino acids in cloudwater: Experimental studies and atmospheric implications
Source: Copernicus journal article supplement (doi:10.5194/bg-2020-250), 2020-07-21
Supplement: Supplementary file 1 [file bg-2020-250-supplement.pdf]

## **SUPPLEMENTARY MATERIAL**

### **Biotic and abiotic transformation of amino acids in cloud water:**

#### **5 Experimental studies and atmospheric implications.**

**S. Jaber, M. Joly, M. Brissy, M. Lereboure, A. Khaled, B. Ervens, and A-M. Delort\***

**10 Université Clermont Auvergne, CNRS, SIGMA Clermont, Institut de Chimie de Clermont-Ferrand, F-63000 Clermont-Ferrand, France**

\*Corresponding author: [A-Marie.delort@uca.fr](mailto:A-Marie.delort@uca.fr)

**Table S1:** Composition of the artificial cloud medium used for biotic and abiotic transformation of amino acids in microcosms.

| Chemical species   | Concentration ( $\mu\text{M}$ ) | Chemical species | Concentration ( $\mu\text{M}$ ) |
|--------------------|---------------------------------|------------------|---------------------------------|
| Acetate            | 100                             | cysteine         | 1                               |
| Formiate           | 72.5                            | glutamic acid    | 1                               |
| Succinate          | 7.5                             | glycine          | 1                               |
| Oxalate            | 15                              | histidine        | 1                               |
| $\text{Cl}^-$      | 200                             | isoleucine       | 1                               |
| $\text{NO}_3^-$    | 400                             | lysine           | 1                               |
| $\text{SO}_4^{2-}$ | 25                              | methionine       | 1                               |
| $\text{Na}^+$      | 1000                            | phenylalanine    | 1                               |
| $\text{NH}_4^+$    | 400                             | proline          | 1                               |
| $\text{K}^+$       | 25                              | serine           | 1                               |
| $\text{Mg}^{2+}$   | 50                              | threonine        | 1                               |
| $\text{Ca}^{2+}$   | 200                             | tryptophan       | 1                               |
| alanine            | 1                               | tyrosine         | 1                               |
| arginine           | 1                               | valine           | 1                               |
| asparagine         | 1                               | glutamine        | 1                               |
| aspartic acid      | 1                               | pH <sup>a</sup>  | 6                               |

15

<sup>a</sup> The pH of the artificial cloud medium was adjusted to 6 (a few drops of NaOH at 1.38 M and of 0.39M  $\text{H}_2\text{SO}_4$ ) and the medium was sterilized by filtration on a polyethersulphone (PES) membrane of 0.20  $\mu\text{m}$  porosity (Fisher Scientific) before use. Note that cysteine was present in the medium but it could not be assayed by LC-HRMS, neither leucine that cannot be distinguished from isoleucine by LC-HRMS.

20

**Table S2:** Retention times, exact masses and LODs and LOQs measured for the 18 AA measured by UPLC-HRMS

| Amino acid | Molecular formula                                | Retention time (min) | m/z [M+H] | LOD ( $\mu\text{M}$ ) | LOQ ( $\mu\text{M}$ ) |
|------------|--------------------------------------------------|----------------------|-----------|-----------------------|-----------------------|
| ALA        | $\text{C}_3\text{H}_7\text{NO}_2$                | 4.25                 | 90.0550   | 0.237                 | 0.474                 |
| ARG        | $\text{C}_6\text{H}_{14}\text{N}_4\text{O}_2$    | 7.41                 | 175.1190  | 0.072                 | 0.143                 |
| ASN        | $\text{C}_4\text{H}_8\text{N}_2\text{O}_3$       | 5.57                 | 133.0608  | 0.143                 | 0.286                 |
| ASP        | $\text{C}_4\text{H}_7\text{NO}_4$                | 5.09                 | 134.0448  | 0.148                 | 0.295                 |
| GLN        | $\text{C}_5\text{H}_{10}\text{N}_2\text{O}_3$    | 5.35                 | 147.0764  | 0.234                 | 0.468                 |
| GLU        | $\text{C}_5\text{H}_9\text{NO}_4$                | 4.8                  | 148.0526  | 0.111                 | 0.222                 |
| GLY        | $\text{C}_2\text{H}_5\text{NO}_2$                | 4.6                  | 76.0393   | 0.242                 | 0.483                 |
| HIS        | $\text{C}_6\text{H}_9\text{N}_3\text{O}_2$       | 7.47                 | 156.0768  | 0.094                 | 0.188                 |
| ILE        | $\text{C}_6\text{H}_{13}\text{NO}_2$             | 2.59                 | 160.1081  | 0.179                 | 0.359                 |
| LYS        | $\text{C}_6\text{H}_{14}\text{N}_2\text{O}_2$    | 7.62                 | 147.1128  | 0.069                 | 0.139                 |
| MET        | $\text{C}_5\text{H}_{11}\text{NO}_2\text{S}$     | 2.69                 | 150.0584  | 0.072                 | 0.144                 |
| PHE        | $\text{C}_9\text{H}_{11}\text{NO}_2$             | 2.64                 | 166.0863  | 0.061                 | 0.122                 |
| PRO        | $\text{C}_5\text{H}_9\text{NO}_2$                | 3.05                 | 116.0706  | 0.140                 | 0.281                 |
| SER        | $\text{C}_3\text{H}_7\text{NO}_3$                | 5.36                 | 106.0499  | 0.135                 | 0.268                 |
| THR        | $\text{C}_4\text{H}_9\text{NO}_3$                | 4.87                 | 120.0655  | 0.163                 | 0.327                 |
| TRP        | $\text{C}_{11}\text{H}_{12}\text{N}_2\text{O}_2$ | 2.65                 | 205.0972  | 0.058                 | 0.117                 |
| TYR        | $\text{C}_9\text{H}_9\text{NO}_3$                | 7.46                 | 182.0812  | 0.072                 | 0.143                 |
| VAL        | $\text{C}_5\text{H}_{11}\text{NO}_2$             | 2.61                 | 118.0863  | 0.237                 | 0.475                 |

30 **Table S3:** Rate constants for 18 amino acids for the OH, O<sub>3</sub> and <sup>1</sup>O<sub>2</sub> reactions

|     | $k_{OH} /$<br>$M^{-1} s^{-1}$ | Reference                   | $k_{O_3} /$<br>$M^{-1} s^{-1}$ | Reference                          | $k_{^1O_2} /$<br>$M^{-1} s^{-1}$ | Reference                      |
|-----|-------------------------------|-----------------------------|--------------------------------|------------------------------------|----------------------------------|--------------------------------|
| ALA | $7.7 \cdot 10^7$              | (Scholes et al., 1965)      | $2.5 \cdot 10^1$               | (Ignatenko and Cherenkevich, 1985) | $2 \cdot 10^6$                   | (Matheson and Lee, 1979)       |
| ARG | $3.5 \cdot 10^9$              | (Buxton et al., 1988)       | $2.8 \cdot 10^2$               | (Ignatenko and Cherenkevich, 1985) | $< 1 \cdot 10^6$                 | (Kraljić and Sharpatyi, 1978)  |
| ASN | $4.9 \cdot 10^7$              | (Masuda et al., 1973)       | $7.0 \cdot 10^1$               | (Ignatenko and Cherenkevich, 1985) |                                  |                                |
| ASP | $4.9 \cdot 10^7$              | (Masuda et al., 1973)       | $5.0 \cdot 10^1$               | (Ignatenko and Cherenkevich, 1985) |                                  |                                |
| GLN | $5.4 \cdot 10^8$              | (Masuda et al., 1973)       | $8.0 \cdot 10^1$               | (Ignatenko and Cherenkevich, 1985) |                                  |                                |
| GLU | $1.6 \cdot 10^8$              |                             | $2 \cdot 10^{-1}$              | (Ignatenko and Cherenkevich, 1985) | $5.0 \cdot 10^5$                 | (McGregor and Anastasio, 2001) |
| GLY | $1.7 \cdot 10^7$              |                             | $2.1 \cdot 10^1$               | (Ignatenko and Cherenkevich, 1985) | $< 1 \cdot 10^5$                 | (Michaeli and Feitelson, 1994) |
| HIS | $5 \cdot 10^9$                | (Motohashi and Saito, 1993) | $3.9 \cdot 10^3$               | (Ignatenko and Cherenkevich, 1985) | $6 \cdot 10^7$                   | (McGregor and Anastasio, 2001) |
| ILE | $1.8 \cdot 10^9$              | (Masuda et al., 1973)       |                                |                                    |                                  |                                |
| LYS | $3.5 \cdot 10^8$              | (Masuda et al., 1973)       | $1.2 \cdot 10^2$               | (Ignatenko and Cherenkevich, 1985) |                                  |                                |
| MET | $8.5 \cdot 10^9$              |                             | $4 \cdot 10^6$                 |                                    | $2.1 \cdot 10^7$                 | (Miskoski and García, 1993)    |
| PHE | $6.5 \cdot 10^9$              | (Buxton et al., 1988)       | $1.3 \cdot 10^3$               | (Ignatenko and Cherenkevich, 1985) | $7 \cdot 10^5$                   | (Michaeli and Feitelson, 1994) |
| PRO | $6.5 \cdot 10^8$              | (Masuda et al., 1973)       | $4.8 \cdot 10^2$               | (Ignatenko and Cherenkevich, 1985) |                                  |                                |
| SER | $2.5 \cdot 10^8$              |                             | $1.8 \cdot 10^2$               | (Ignatenko and Cherenkevich, 1985) |                                  |                                |
| THR | $5.1 \cdot 10^8$              | (Masuda et al., 1973)       | $2.6 \cdot 10^2$               | (Ignatenko and Cherenkevich, 1985) |                                  |                                |
| TRP | $1.3 \cdot 10^{10}$           | (Buxton et al., 1988)       | $5.6 \cdot 10^4$               | (Ignatenko and Cherenkevich, 1985) | $4.1 \cdot 10^7$                 | (McGregor and Anastasio, 2001) |
| TYR | $1.3 \cdot 10^{10}$           | (Solar et al., 1984)        | $4.8 \cdot 10^3$               | (Ignatenko and Cherenkevich, 1985) | $5 \cdot 10^6$                   | (McGregor and Anastasio, 2001) |

|     |                  |                            |                |                                       |  |  |
|-----|------------------|----------------------------|----------------|---------------------------------------|--|--|
|     |                  |                            |                |                                       |  |  |
| VAL | $8.5 \cdot 10^8$ | (Prütz and Vogel,<br>1976) | $4 \cdot 10^1$ | (Ignatenko and<br>Cherenkevich, 1985) |  |  |

**Table S4:** Selected experimental studies of amino acid oxidation by various oxidants. Note that the experimental conditions were not necessarily atmospherically-relevant. Products are only listed to demonstrate the wide variety of possible reaction pathways and products.

| Amino acid               | Oxidant              | Main product(s)                                                                      | Reference                                                          |
|--------------------------|----------------------|--------------------------------------------------------------------------------------|--------------------------------------------------------------------|
| ARG                      | Fenton chemistry     | glutamic semialdehyde                                                                | (Stadtman, 1993; Stadtman and Levine, 2003) and reference therein  |
| ASP                      | OH                   | NH <sub>3</sub> , Malonic, oxalic and formic acids                                   | (Marion et al., 2018)                                              |
| CYS                      | Fenton chemistry     | -S-S-disulfide cross-links                                                           | (Stadtman, 1993; Stadtman and Levine, 2003)                        |
| GLY                      | OH                   | Oxalic, formic, oxamic acids                                                         | (Berger et al., 1999)                                              |
| GLY                      | O <sub>3</sub>       | Nitrate, nitrites                                                                    | (Berger et al., 1999)                                              |
| GLY-ALA-VAL-PRO peptides | OH                   | Hydroperoxides, alcohols                                                             | (Morgan et al., 2012)                                              |
| HIS                      | O <sub>3</sub>       | PRO                                                                                  | (Mudd et al., 1969)                                                |
| HIS                      | Fenton chemistry     | ASP, ASN, 2-oxoimidazoline                                                           | (Stadtman, 1993; Stadtman and Levine, 2003) and references therein |
| LEU                      | OH                   | Isovaleric acid and other carbonyl compounds                                         |                                                                    |
| LYS                      | Fenton chemistry     | 2-amino-adipic semialdehyde                                                          | (Stadtman, 1993; Stadtman and Levine, 2003) and references therein |
| MET                      | O <sub>3</sub>       | Methionine sulfoxide                                                                 | (Mudd et al., 1969)                                                |
| PHE                      | ROS                  | TYR                                                                                  | (Stadtman, 1993; Stadtman and Levine, 2003)                        |
| PHE                      | Direct UV absorption | TYR                                                                                  | (Pattison et al., 2012)                                            |
| PRO                      | Fenton chemistry     | GLU, pyroglutamate, Cis/trans-4-hydroxyproline, 2-pyrrolidone, glutamic semialdehyde | (Stadtman, 1993; Stadtman and Levine, 2003) and reference therein  |
| SER                      | OH                   | carbonyl and carboxylic acid                                                         |                                                                    |
| THR                      | Fenton chemistry     | 2-amino-3-ketobutyric acid                                                           | (Stadtman, 1993; Stadtman and Levine, 2003) and references therein |
| THR                      | O <sub>3</sub>       | Dihydroxyphenylalanine                                                               | (Mudd et al., 1969)                                                |

|     |                                                     |                                                                                               |                                                                    |
|-----|-----------------------------------------------------|-----------------------------------------------------------------------------------------------|--------------------------------------------------------------------|
| TRP | OH                                                  | Formic and acetic acids, many aromatic intermediates                                          | (Bianco et al., 2016)                                              |
| TRP | <sup>1</sup> O <sub>2</sub>                         | 3α-hydroxypyrrroloindole; <i>N</i> -formylkynurenine, kynurenine, 3α-dihydroxypyrrroloindole. |                                                                    |
| TYR | OH                                                  | Enedial                                                                                       | (Prasse et al., 2018)                                              |
| TYR | Fenton chemistry                                    | Tyr-Tyr cross-links                                                                           | (Stadtman, 1993; Stadtman and Levine, 2003) and references therein |
| TYR | <sup>1</sup> O <sub>2</sub> or direct UV absorption | 3α-hydroxy-6-oxo-2,3,3a,6,7,7a-hexahydro-1H-indol-2-carboxylic acid                           |                                                                    |

40

45

50

55

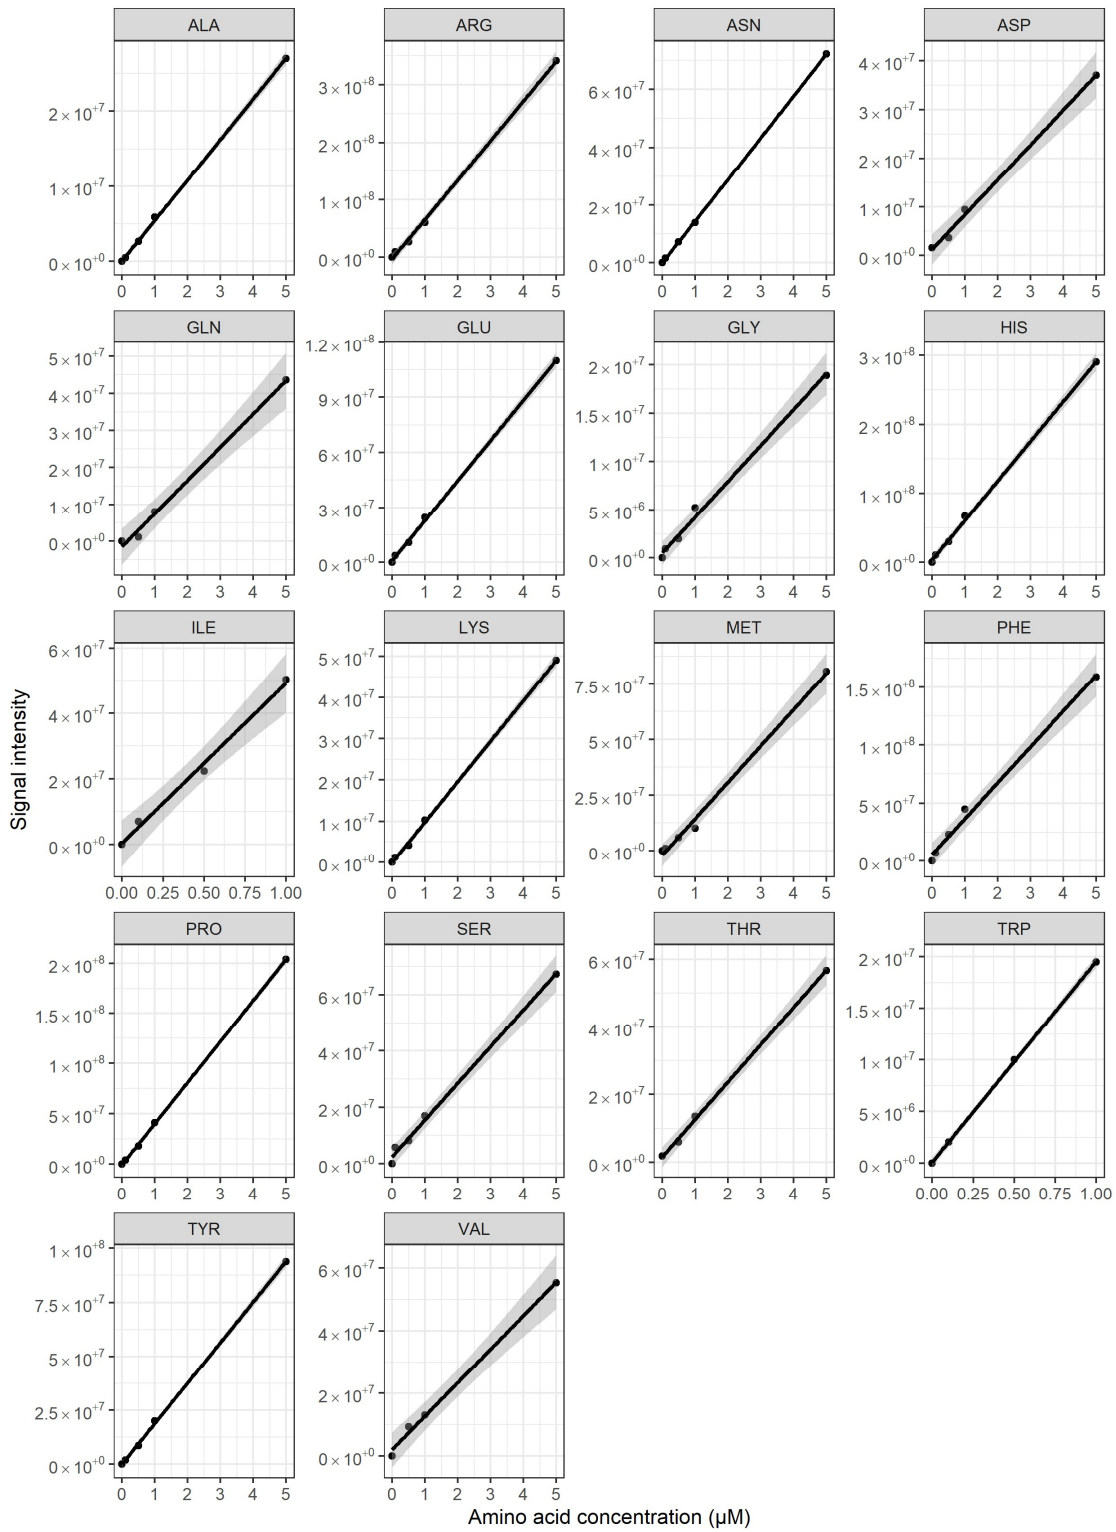

60 **Figure S1:** Calibration curves for LC-HRMS experiments



### Example of biodegradation rate calculation:

Bacterial degradation of amino acids follows a first order decay equation as  $C_t = C_0 \cdot e^{-kt}$  with  $t$  the incubation time,  $C_0$  and  $C_t$  the initial concentration and concentration at  $t$  respectively and  $k$  the first order decay constant.

First, concentration of each amino acid is followed through time (Figure S2A) by LC-HRMS as described in the Materials and Methods section. Values are converted to determine  $k$  corresponding to the slope of  $\ln(C_t/C_0) = f(t)$  (Figure S2B)

Biodegradation rates are then calculated as follows:  $V_b = \frac{k \times C_0}{N_{cell}}$  with  $V_b$  the biodegradation rate (in  $\text{mol h}^{-1} \text{ cell}^{-1}$ ),  $k$  the first order decay constant (in  $\text{h}^{-1}$ ),  $C_0$  the initial concentration in amino acid (in  $\text{mol L}^{-1}$ ) and  $N_{cell}$  the bacterial concentration (in  $\text{cell L}^{-1}$ ).

In this example,  $N_{cell} = 4 \cdot 10^8 \text{ cell L}^{-1}$  and  $C_0 = 1.16 \cdot 10^{-6} \text{ mol L}^{-1}$  so  $V_b = 8.88 \cdot 10^{-16} \text{ mol h}^{-1} \text{ cell}^{-1}$

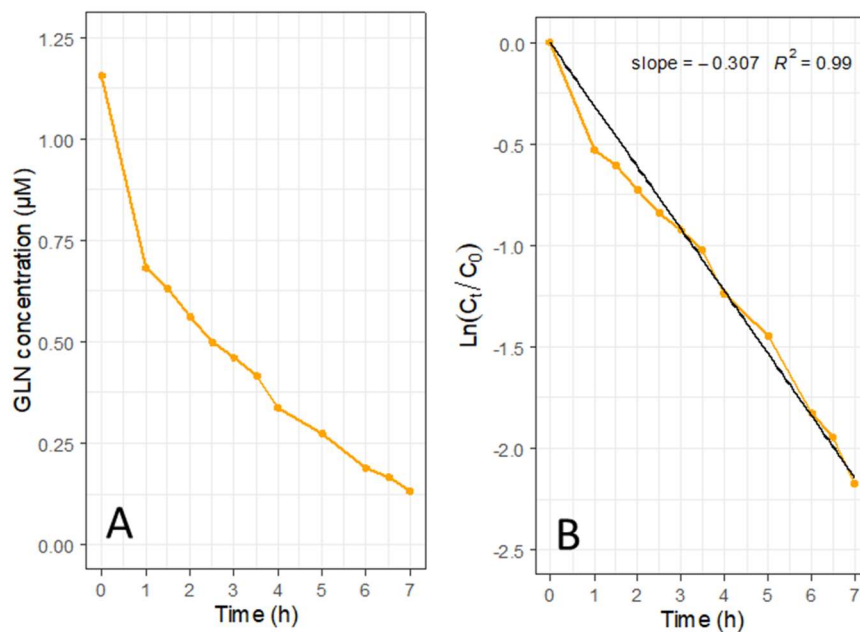

**Figures S2:** Example of calculation of the biodegradation rate of GLN. A) time dependence of GLN concentration with time measured by LC-HRMS. B)  $\ln(C_t/C_0)=f(t)$ , degradation rates are calculated from the slope at the origin.

$C_t$ : GLN measured concentration at time =  $t$ ,  $C_0$ :GLN measured concentration at time zero.

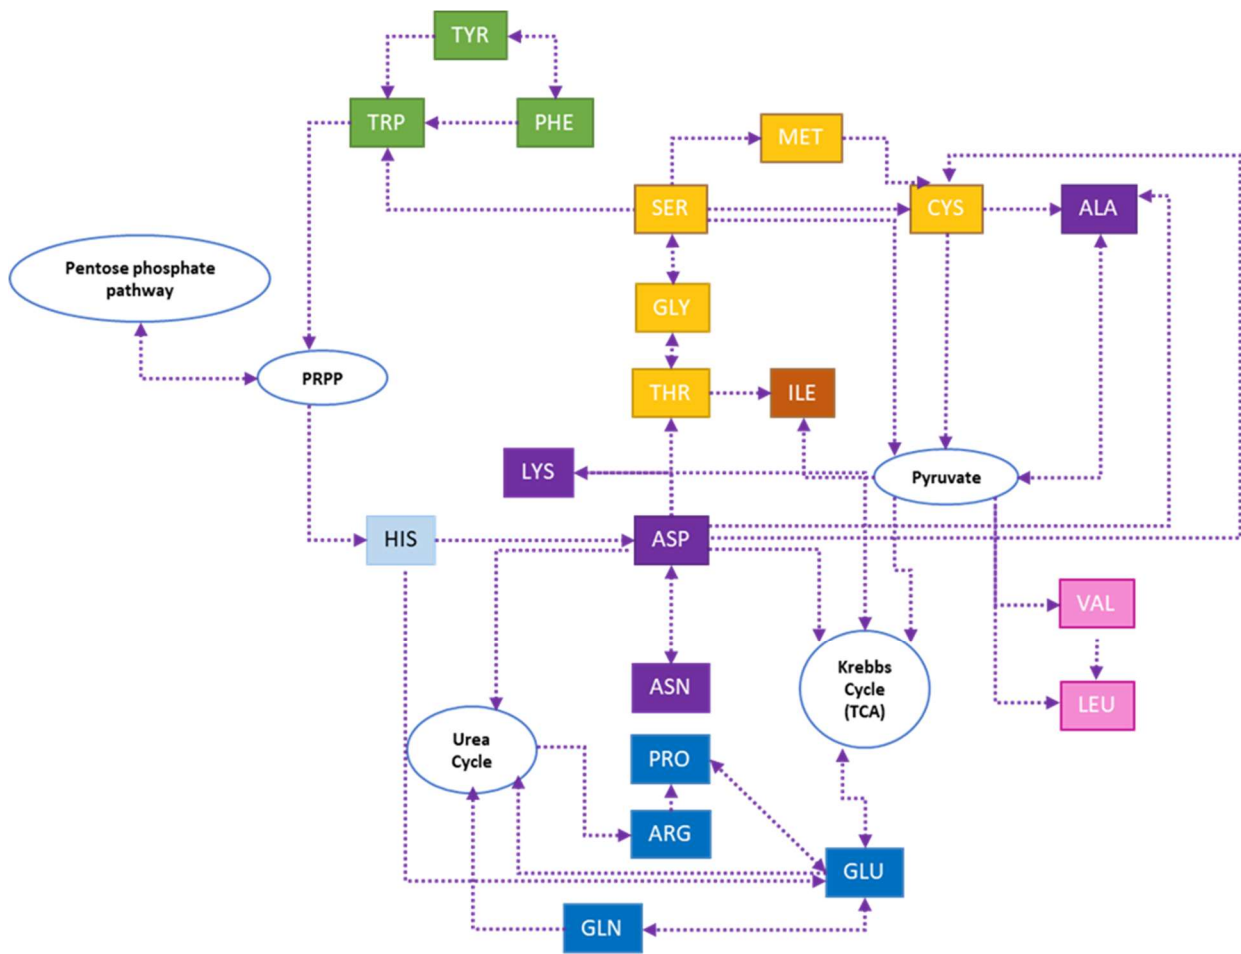

**Figure S3:** Main metabolic routes for AA metabolism according to KEGG pathway database.

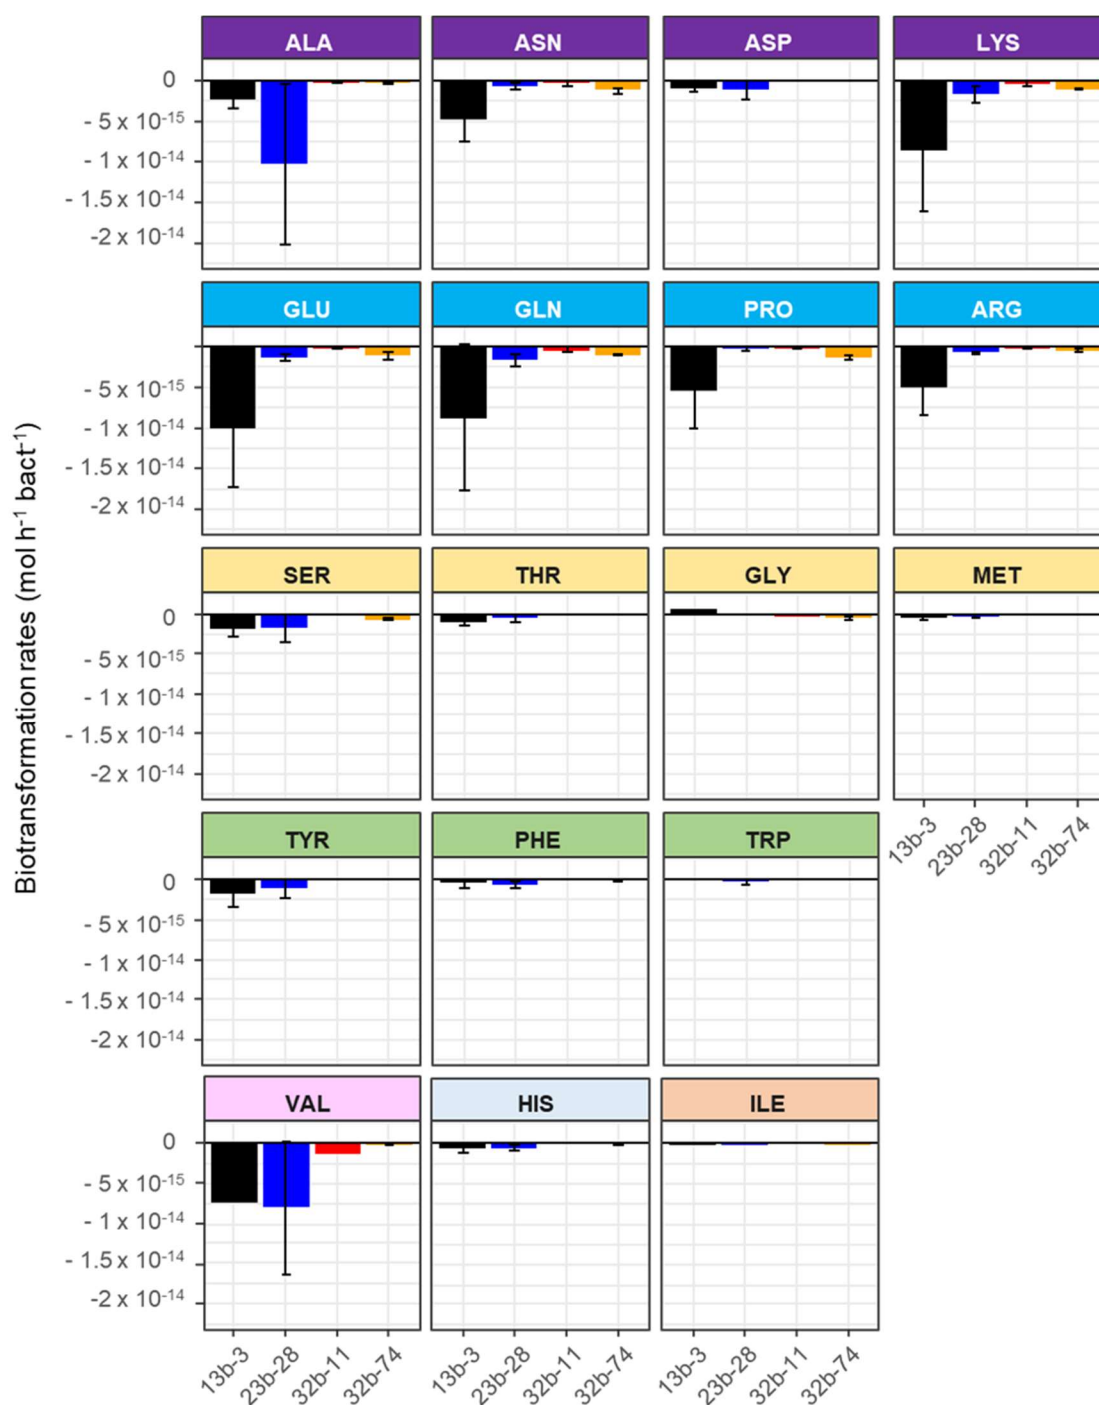

**Figure S4:** Biotransformation rates (mol bact<sup>-1</sup> h<sup>-1</sup>) of AA by the four bacterial strains grouped according to the metabolic pathways of the AA (see Figure S3). *Pseudomonas graminis* PDD-13b-3 in black, *Rhodococcus enclensis* PDD-23b-28 in blue, *Sphingomonas* sp. PDD-32b-11 in red and *Pseudomonas syringae* PDD-32b-74 in orange). The standard error bars reflect the rather important biological variability measured from 3 triplicates (independent incubations). Positive values correspond to a biosynthesis process, negative values to a biodegradation process.

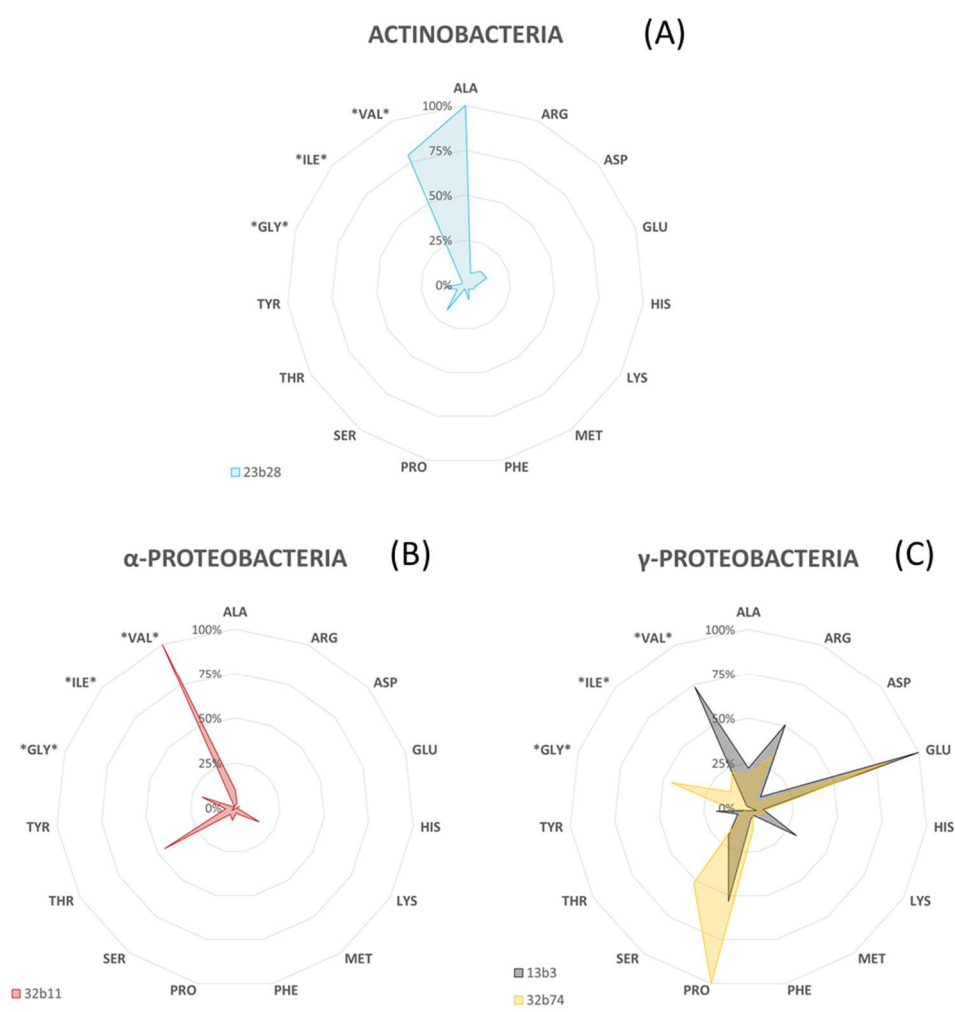

**Figure S5:** Comparison of the ability of the different strains to metabolize amino acids according to their phylogeny: (A) Actinobacteria (*Rhodococcus enclensis* PDD-23b-28 in blue), (B)  $\alpha$ -Proteobacteria (*Spingomonas* sp PDD-32b-11 in red), (C)  $\gamma$ -Proteobacteria (*Pseudomonas graminis* PDD-13b-3 in black and *Pseudomonas syringae* PDD-32b-74 in yellow). The rates of biodegradation (average from 3 replicates) are presented as a % for each amino acid in the form of a radar plot. For each strain the highest rate is put at 100%. (\* only one replicate value was available).

## References

- Berger, P., Karpel Vel Leitner, N., Doré, M. and Legube, B.: Ozone and hydroxyl radicals induced oxidation of glycine, *Water Res.*, doi:10.1016/S0043-1354(98)00230-9, 1999.
- Bianco, A., Passananti, M., Deguillaume, L., Mailhot, G. and Brigante, M.: Tryptophan and tryptophan-like substances in cloud water: Occurrence and photochemical fate, *Atmos. Environ.*, doi:10.1016/j.atmosenv.2016.04.034, 2016.
- Buxton, G. V., Greenstock, C. L., Helman, W. P. and Ross, A. B.: Critical Review of rate constants for reactions of hydrated electrons, hydrogen atoms and hydroxyl radicals ( $\cdot\text{OH}/\cdot\text{O}^-$  in Aqueous Solution, *J. Phys. Chem. Ref. Data*, doi:10.1063/1.555805, 1988.
- Ignatenko, A. V. and Cherenkevich, S. N.: reactivity of amino acids and proteins in reaction with ozone, *Kinet. Catal.*, 1985.
- KEGG pathway database. [https://www.genome.jp/kegg-bin/show\\_pathway?map012](https://www.genome.jp/kegg-bin/show_pathway?map012)
- Kraljić, I. and Sharpatyi, V. A.: Determination of singlet oxygen rate constants in aqueous solutions, *Photochem. Photobiol.*, doi:10.1111/j.1751-1097.1978.tb06973.x, 1978.
- Marion, A., Brigante, M. and Mailhot, G.: A new source of ammonia and carboxylic acids in cloud water: The first evidence of photochemical process involving an iron-amino acid complex, *Atmos. Environ.*, doi:10.1016/j.atmosenv.2018.09.060, 2018.
- Masuda, T., Nakano, S. and Kondo, M.: Rate Constants for the Reactions of OH Radicals with the Enzyme Proteins as Determined by the p-Nitrosodimethylaniline Method, *J. Radiat. Res.*, doi:10.1269/jrr.14.339, 1973.
- Matheson, I. B. C. and Lee, J.: Chemical reaction rates of amino acids with singlet oxygen, *Photochem. Photobiol.*, doi:10.1111/j.1751-1097.1979.tb07786.x, 1979.
- McGregor, K. G. and Anastasio, C.: Chemistry of fog waters in California's Central Valley: 2. Photochemical transformations of amino acids and alkyl amines, *Atmos. Environ.*, doi:10.1016/S1352-2310(00)00282-X, 2001.
- Michaeli, A. and Feitelson, J.: Reactivity of singlet oxygen towards amino acids and peptides, *Photochem. Photobiol.*, doi:10.1111/j.1751-1097.1994.tb05035.x, 1994.
- Miskoski, S. and García, N. A.: Influence of the peptide bond on the singlet molecular oxygen-mediated ( $\text{O}_2[\text{g}]$ ) photooxydation of histidine and methionine peptides, *Photochem. Photobiol.*, doi:10.1111/j.1751-1097.1993.tb02317.x, 1993.
- Morgan, P. E., Pattison, D. I. and Davies, M. J.: Quantification of hydroxyl radical-derived oxidation products in peptides containing glycine, alanine, valine, and proline, *Free Radic. Biol. Med.*, doi:10.1016/j.freeradbiomed.2011.10.448, 2012.
- Motohashi, N. and Saito, Y.: Competitive Measurement of Rate Constants for Hydroxyl Radical Reactions Using Radiolytic Hydroxylation of Benzoate, *Chem. Pharm. Bull.*, doi:10.1248/cpb.41.1842, 1993.
- Mudd, J. B., Leavitt, R., Ongun, A. and McManus, T. T.: Reaction of ozone with amino acids and proteins, *Atmos. Environ.*, doi:10.1016/0004-6981(69)90024-9, 1969.
- Pattison, D. I., Rahmanto, A. S. and Davies, M. J.: Photo-oxidation of proteins, *Photochem.*

Photobiol. Sci., doi:10.1039/c1pp05164d, 2012.

Prasse, C., Ford, B., Nomura, D. K. and Sedlak, D. L.: Unexpected transformation of dissolved phenols to toxic dicarbonyls by hydroxyl radicals and UV light, Proc. Natl. Acad. Sci. U. S. A., doi:10.1073/pnas.1715821115, 2018.

Prütz, W. A. and Vogel, S. V.: Specific Rate Constants of Hydroxyl Radical and Hydrated Electron Reactions Determined by the RCL Method, Zeitschrift fur Naturforsch. - Sect. B J. Chem. Sci., doi:10.1515/znb-1976-1115, 1976.

Scholes, G., Shaw, P., Wilson, R. L. and Ebert, M.: pulse radiolysis studies of aqueous solutions of nucleic acid and related substances., in Pulse Radiolysis, in Pulse radiolysis ., pp. 151–164, M. Ebert, J.P. Keene, A.J. Swallow and J.H. Baxendale, Academic Press, London, New York., 1965.

Solar, S., Solar, W. and Getoff, N.: Reactivity of OH with tyrosine in aqueous solution studied by pulse radiolysis, J. Phys. Chem., doi:10.1021/j150654a030, 1984.

Stadtman, E. R.: Oxidation of Free Amino Acids and Amino Acid Residues in Proteins by Radiolysis and by Metal-Catalyzed Reactions, Annu. Rev. Biochem., doi:10.1146/annurev.bi.62.070193.004053, 1993.

Stadtman, E. R. and Levine, R. L.: Free radical-mediated oxidation of free amino acids and amino acid residues in proteins, Amino Acids, doi:10.1007/s00726-003-0011-2, 2003.
